# Supplementary material for: Ion-responsive alginate based macroporous injectable hydrogel scaffolds prepared by emulsion templating
Source: Royal Society of Chemistry journal article supplement (doi:10.1039/c3tb20888e), 2013-01-01

# Swelling & De-swelling of Methacrylated-alginate PolyHIPE Hydrogel

100 mM  $\text{CaCl}_2$  (80 ml) X 720 normal speed  
Video length 60 min

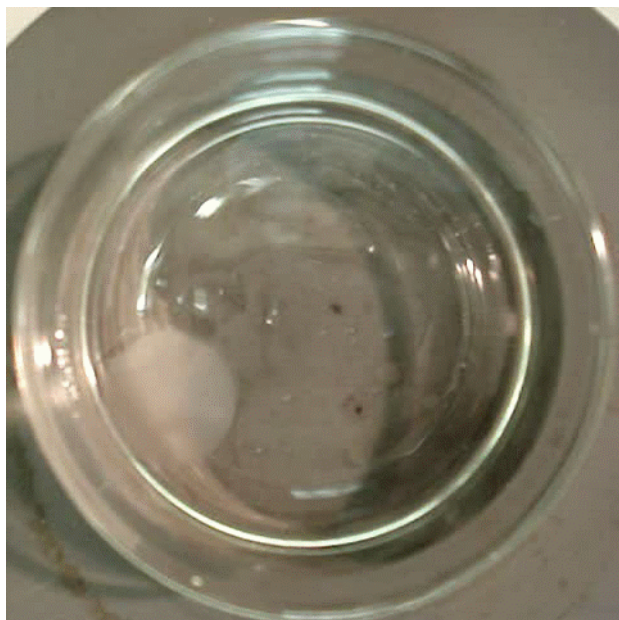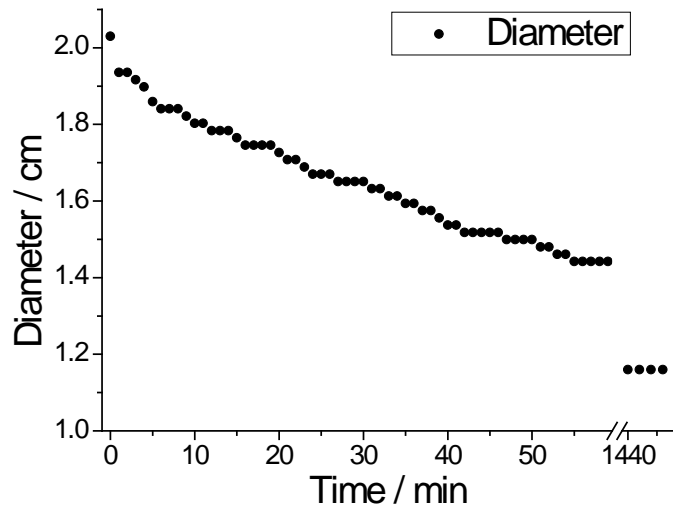

100 mM sodium citrate (80 ml) X 330 normal speed  
Video length 25.5 min

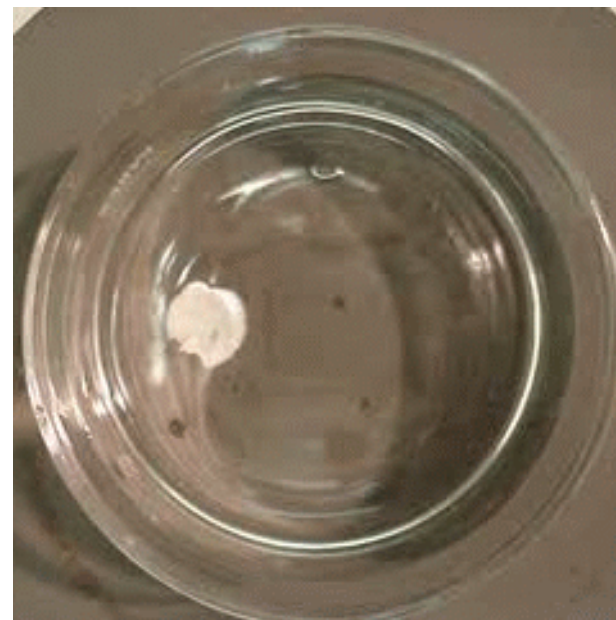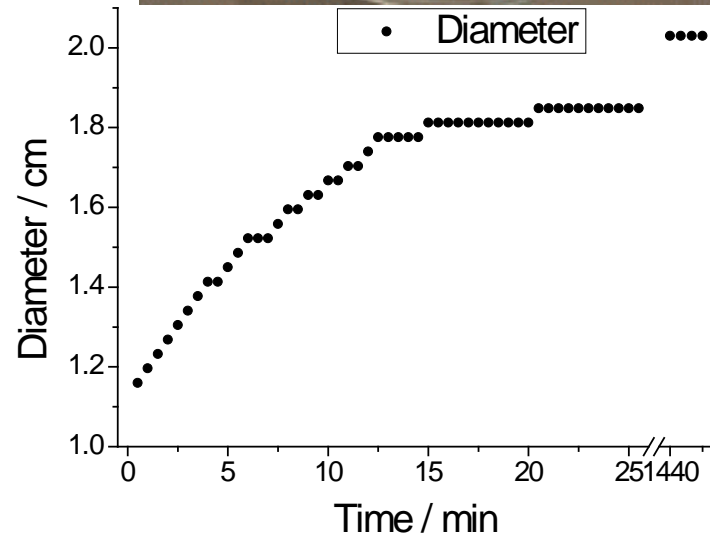

Supplement: c3tb20888e.pdf [file c3tb20888e.pdf]
